# Supplementary material
Source: publisher figshare collection journal article supplement (https://asha.figshare.com/articles/dataset/_/16435290)
Supplement: Supplementary file 5 [file 1]

## **Supplemental Material S1.** References that informed the creation of each taxonomy aspect.

### **Aspect One (Modality/Domain)**

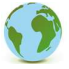

#### **Background for Aspect One**

Assessments and interventions for school-age children with language disorder may be described as targeting comprehension (reception) or production (expression) of language in spoken or written modes (including AAC) (American Speech-Language-Hearing Association, n.d.; Cirrin & Gillam, 2008; Law et al., 2003). Target areas may include syntax/morphology, semantics, social abilities or structural elements in text or discourse (Apel, 2014; Beukelman & Mirenda, 2013b; Boyle et al., 2010; Law et al., 2003; Marton et al., 2005). Meta-abilities (Boyle et al., 2010; Hyter, 2003; Larson & McKinley, 2003b; Law et al., 2008; Robertson, 2007) and executive functions, particularly working memory (Hyter, 2003; Montgomery et al., 2010; Serry et al., 2008; Singer & Bashir, 1999; Ukrainetz, 2006b), may also be targeted in assessments and interventions for children with language disorders.

In this taxonomy, interventions are described by modality targeted (i.e., spoken or written), by domain/s targeted and as targeting comprehension or production.

Note: Given the aim of this taxonomy, Aspect I is based on literature regarding areas that SLP's target in assessment and intervention of children with language disorder. This aspect is not intended to represent a theoretical construct for language; nor is it intended to be a framework for language processing or development.

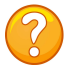

#### **Definitions for Aspect One**

##### **Spoken/Written (Modality)**

**Spoken Language:** Language exchanged verbally (American Speech-Language-Hearing Association, n.d.), or via an alternative to verbal communication in situations where peers would typically use verbal communication. This may also include pre-linguistic forms of communication.

- Single modality: using one mode i.e., speech-only (or AUSLAN for children with hearing impairment).
- Multi-modality: using multiple modes i.e., Key Word Sign or speech combined with symbols.

**Written Language:** Language exchanged through written text (American Speech-Language-Hearing Association, n.d.), or via an alternative to verbal communication in situations where peers would typically use verbal communication.

- Single modality: using one mode i.e., text-only (or Braille for children with vision impairment).
- Multi-modality: using multiple modes i.e., text combined with symbols or use of pictures to support text.

## Domain

**Semantics:** Understanding and expression of words and word meanings, including vocabulary, word retrieval and lexical meaning (American Speech-Language-Hearing Association, n.d.; Beukelman & Mirenda, 2013b; Boyle et al., 2007).

**Morphosyntax:** Understanding and expression of different word forms and the order and combination of words in sentences (American Speech-Language-Hearing Association, n.d.; Beukelman & Mirenda, 2013b; Boyle et al., 2007).

**Social Abilities and Discourse (Pragmatics):** Giving and making meaning in social context or communication for social purposes (Beukelman & Mirenda, 2013b; Loukusaa & Moilanenb, 2009; Marton et al., 2005; Owens Jr, 2013; Paul & Norbury, 2012a). This includes:

- **Pre-linguistic communication:** Facial expression, gestures, joint attention etc. (Paul & Norbury, 2012b).
- **Communication intentions/purposes:** Requesting, commenting, asking questions, giving information, expressing an opinion, giving reasons, making predictions etc. (Beukelman & Mirenda, 2013b; Kaderavek, 2015a; Paul & Norbury, 2012a; Snell et al., 2006)
- **Non-verbal communication:** Understanding emotions from body language and facial expressions (Larson & McKinley, 2003b; Lopata et al., 2008; Wright et al., 2008).
- **Non-literal language:** Inferences, idioms, metaphors, jokes, sarcasm etc. (Loukusaa & Moilanenb, 2009; Vogindroukas & Zikopoulou, 2011).
- **Matching communication style to social context:** Adjusting communication style between friends and teachers (Larson & McKinley, 2003b; Paul & Norbury, 2012a)
- **Conversation conventions:** Topic selection, topic maintenance, conversational turn-taking etc. (Kaderavek, 2015a).
- **Text cohesion:** Verbal fluency or transitions between sentences/paragraphs (Hall-Mills, 2010; Larson & McKinley, 2003b).
- **Text organization** (discourse or macrostructure): Narrative structure (story grammar) or episodic structure (introduction/body/ending) (Boulineau et al., 2004; Hall-Mills, 2010; Kaderavek, 2015a; Wolf Nelson & Van Meter, 2007). Types of discourse include narrative, expository, persuasive and conversation (Hayward & Schneider, 2000; Kaderavek, 2015a; Nippold, 2010; Pearce et al., 2010; Westerveld & Claessen, 2014).

**Meta-Abilities:** Ability to think about own thought processes and understand how to regulate these processes for effective learning (American Speech-Language-Hearing Association, n.d.; Larson & McKinley, 2003b; Law et al., 2008). This includes:

- **Meta-cognition:** Knowledge and use of strategies for managing and self-monitoring own learning (Larson & McKinley, 2003b).
- **Meta-language (includes phonological awareness, meta-linguistic and meta-narrative skills):** Knowledge of phonemic, morphological, syntactical, or text-level rules in relation to own skills; and ability to effectively apply these rules for improved performance (Larson & McKinley, 2003b).
- **Meta-pragmatics:** Knowledge of social conventions in relation to own communication and ability to apply this knowledge to improve communication with others (Larson & McKinley, 2003b).

**Executive Functions:** Collection of related cognitive processes necessary for execution of goal-directed, controlled, purposeful behavior (Dawson & Guare, 2015; Henry et al., 2012; Singer & Bashir, 1999; Ukrainetz, 2006a; Wolter, 2007). These processes include:

- **Inhibition (self-control):** Suppression of inappropriate thoughts, comments and behaviors in order to focus and attend to tasks.
- **Emotion control (self-regulation):** Ability to manage emotions for goal achievement and task completion.
- **Working memory:** Retention, processing, and manipulation of pieces of information for short periods of time in order to complete required tasks.
- **Organization (strategic planning):** Organizational strategies for task completion (e.g., envisioning the end product, planning steps to complete tasks, and formulating solutions to problems).
- **Mental flexibility:** Integration of prior knowledge and experiences when completing tasks and effective application of different rules for different situations.
- **Sustained attention:** Ability to maintain attention to tasks despite distractions and fatigue.

### **Comprehension/Production**

**Comprehension:** Understanding of information, knowledge and ideas communicated by others either verbally or non-verbally (American Speech-Language-Hearing Association, n.d.; Boyle et al., 2007; Law et al., 2003).

**Production:** Ability to convey information, knowledge, and ideas to others (either verbally or non-verbally (American Speech-Language-Hearing Association, n.d.; Boyle et al., 2007; Law et al., 2003).

## Aspect Two (Intervention Purpose)

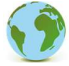

### **Background for Aspect Two**

Interventions are typically undertaken for purposes of achieving typical development in relation to peers or addressing concerns related to academic performance and social-emotional wellbeing (Paul & Norbury, 2012c; Ukrainetz, 2015a; World Health Organization, 2015). Intervention may focus on remediation by directly developing expected skills to alleviate impairment (Justice & Redle, 2014; Larson & McKinley, 2003a; Paul & Norbury, 2012c; Schraeder, 2008). Alternatively, intervention may focus on teaching strategies for improved learning and functioning (Justice & Redle, 2014; Larson & McKinley, 2003a; Paul & Norbury, 2012c; Schraeder, 2008). For example, teaching strategies to support learning in the presence of an impairment (Gill et al., 2003) or teaching use of assistive devices to improve performance (Shadiev et al., 2014).

This taxonomy summarizes purposes of interventions skill development or strategy use.

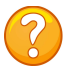

### **Definitions for Aspect Two**

**Skill Development:** Directly teach skills that impaired or lacking (i.e., lessen the degree of disorder or remediate deficits associated with a condition) for improved communication (Justice & Redle, 2014).

**Strategy Use:** Improve communication by teaching functional strategies. The intervention does not intend to directly alter the disorder but aims to teach use of strategies (i.e., compensatory strategies) for more effective communication (Justice & Redle, 2014).

Note: Use of AAC or multi-modal communication does not in itself alter the purpose of the language intervention. AAC may act as compensation for speech production; however, should not be viewed as compensation for language comprehension or production when applying this taxonomy.

### Aspect Three (Intervention Delivery)

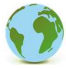

#### **Background for Aspect Three**

Interventions may be delivered by SLP's or by another trained person (Boyle et al., 2007; Dickson et al., 2009; Law et al., 2003; McCauley et al., 2017; Reichow & Volkmar, 2010; Roberts & Kaiser, 2011; Zabiela et al., 2007); and may be delivered face-to-face or via ICTs (American Speech-Language-Hearing Association, 2010; Edwards et al., 2012; Fairweather et al., 2016; Mashima & Doarn, 2009). Software programs may also be used to provide interventions (Gillam et al., 2001; Pokorni et al., 2004; Ramdoss et al., 2011). Interventions may be conducted individually or in groups (Cirrin et al., 2010; Larson & McKinley, 2003c; Schraeder, 2008) and may be delivered in different communicative environments (e.g., clinic, school, home, community) (Fey, 1986b; McCauley et al., 2017; Paul & Roth, 2011; Reichow & Volkmar, 2010; Snell et al., 2006).

In schools, terms such as “consultative” “curriculum-based and “classroom-based” apply a range of service delivery options (Ukrainetz, 2015b). These terms are defined inconsistently across the literature, but cover services such as: SLP and teacher providing joint whole class instruction; SLP providing individualized support to identified children in class whilst the teacher instructs the whole class; SLP providing training or intervention materials for teachers to implement; or SLP providing input into curriculum differentiation for whole classes or individual children (Archibald, 2017; Hemmeter, 2000; Hyter, 2003; Paul & Norbury, 2012c; Schraeder, 2008; Throneburg et al., 2000; Ukrainetz, 2015b). In contemporary school-based literature, SLP services are also often described within a Response-to-Intervention (RTI) model (American Speech-Language-Hearing Association, 2010; Law et al., 2012; Sanger et al., 2012; Speech Pathology Australia, 2014). In this model, intensity of support may increase across three tiers, depending a child's measured response to previous supports and interventions (Archibald, 2017; Haynes & Pindzola, 2012). Tier one services support whole group teaching and curriculum differentiation, tier two services support focused interventions to small groups of identified children and tier three services support individualized interventions (Law et al., 2012; Pullen et al., 2010).

In this taxonomy, interventions are described across three components: method i.e., Delivered by SLP, Delivered by Other or Software-Delivered; Format (i.e., “Tier” of support) and Environmental Context (i.e., clinic or community). Interventions delivered by an SLP or another person may also be identified as face-to-face or ICT delivered.

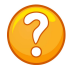

### **Definitions for Aspect Three**

#### **Method**

**Delivered by SLP:** Interventions primarily delivered by an SLP. These interventions may involve others as communication partners or include follow-up activities or homework delivered by others; however, the SLP is the primary person providing the intervention for the duration of the intervention block (Boyle et al., 2007).

**Delivered by Other:** Interventions primarily delivered by other people (e.g., parent, teacher, teacher-aide, other-professional, therapy assistant, etc.). The role of SLP input is to train or support "others" (Boyle et al., 2007). This may include providing training, giving instructions/advice, providing coaching or supplying intervention materials. The SLP may also conduct intervention with the children for the purpose of modelling or demonstrating to those being trained. The level of SLP input may vary highly depending on the training needs or may vary over time (i.e., the SLP may have high input initially which then reduces as the "other" person becomes trained).

Note: It is acknowledged that significant SLP time may be involved in training "others" and that varied approaches may be used, however it is beyond the scope of this taxonomy to describe methods involved in training others.

Interventions delivered by a person may be:

- **Face-face:** The children and person delivering the intervention are in the same room (American Speech-Language-Hearing Association, 2010).
- **ICT (telehealth):** Intervention is delivered with the assessor and the children communicating through information and communication technologies (ICTs), including videoconferencing, web-conferencing, and telephone (American Speech-Language-Hearing Association, 2010; Molini-Avejonas et al., 2015). Technology that is not used for simultaneous two-way communication between individuals during intervention (e.g., audio/video recorders) is not considered ICT.

**Software Delivered:** The intervention is predominantly a computerized process (App or web-based program etc) with no (or very limited) input from a person (Knight et al., 2013). The software program selects and presents tasks and gives children feedback. A person may set a child up at a computer or be present as adult supervision; however, the process is predominantly computerized i.e., software program selects and presents tasks, provides feedback to the children and collects data. If a person is required to deliver tasks, provide feedback, or record data, then the intervention is not categorized as software.

### **Format**

**Whole class (RTI Tier 1):** Interventions delivered as (and suited for) whole class teaching (i.e., one adult per seven or more children). This may include universal design or techniques for curriculum differentiation (Law et al., 2012; Sanger et al., 2012).

**Small group (RTI Tier 2):** Interventions delivered as (and suited for) small group teaching (i.e., one adult for two-six children). This may include in-class focused support for small groups of "at-risk" children (Law et al., 2012; Sanger et al., 2012).

**Individualized (RTI Tier 3):** Interventions delivered to individual children (Law et al., 2012; Sanger et al., 2012).

### **Environmental Context**

**Clinical:** Skills are learned in a clinical context i.e., intervention does not incorporate materials or communication partners from day-to-day environments (Fey, 1986a; McCauley et al., 2017).

#### **Community:**

- **School:** Intervention occurs in a school (or Kindy) context i.e., incorporates communication partners, communication situations and materials that represent a school environment. Other terms used include "curriculum-based" or "classroom-based" intervention (McCauley et al., 2017; Ukrainetz, 2015b).
- **Home:** Intervention occurs in a home context i.e., incorporates communication partners, communication situations and materials that represent a home environment (Fey, 1986a; McCauley et al., 2017; Paul & Roth, 2011).
- **Other:** Intervention occurs in a community context i.e., incorporates communication partners, communication situations and materials that represent a community environment (Fey, 1986a; McCauley et al., 2017; Paul & Roth, 2011).

## Aspect Four (Intervention Form)

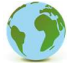

### **Background for Aspect Four**

Language interventions may be described by the types of tasks through which intervention occurs (McCauley et al., 2017), although variation exists across literature with regards to the definitions and interpretation of terms (Hepting & Goldstein, 1996). Descriptions relate to the naturalism of the interactions (Eisenberg, 2014; Fey, 1986c, 1986d, 1986e; Gillam et al., 2012; Norris & Hoffman, 1990; Snell et al., 2006; Ukrainetz, 2015a) or hierarchy/structure of the teaching (Helland et al., 2011; Koole et al., 2015; Paesani, 2005; Ukrainetz, 2015a).

In this taxonomy, these distinctions are covered in one component (i.e., task-type). Categories are based on those proposed by Ukrainetz (2015a) with information from other literature considered in relation to the definitions of categories (Gillam et al., 2012; Koole et al., 2015).

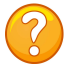

### **Definitions for Aspect Four**

#### **Task-Type**

##### **Decontextualized – Hierarchical**

Other related terms may include “traditional” or “discrete skill” intervention (Gillam et al., 2012; Koole et al., 2015).

Features of these interventions include:

##### *Naturalness*

Discrete skills are targeted in highly structured tasks that are selected and directed by the clinician (Damico & Damico, 1997; Fey, 1986e). Intervention sessions typically consist of a series of repetitive, drill-based tasks with minimal topic continuity between tasks (Camarata & Nelson, 1992; Gillam et al., 2012). Games (or motivating items) may be used to make tasks entertaining, however the target skills are not an inherent part of the game (Ukrainetz, 2015a).

##### *Structure*

Skills are taught following a set (usually developmental) sequence (i.e., bottom-up or deductive approach), with progress to subsequent tasks dependent on mastery of previously targeted skills (Helland et al., 2011; Paesani, 2005; Ukrainetz, 2015a). Later stages may move towards more contextualized activities for generalization, however intervention begins by teaching skills in decontextualized tasks (this unlike contextualized and activity-focused interventions which occur in naturalistic or real-life activities from the outset (Camarata & Nelson, 1992).

##### *Theoretical background*

The underlying theory is that earlier developing skills should be taught first, and skills are mastered in highly structured situations before generalization to everyday communicative contexts (Camarata & Nelson, 1992).

##### **Decontextualized - Non-hierarchical**

Other terms may include: “skill-stimulation” (Ukrainetz, 2015a).

Features of these interventions include:



### *Naturalness*

Same as Decontextualized-Hierarchical (see section above).

### *Structure*

A variety of skills are practiced without a defined teaching sequence or a plan for how skills combine. Intervention does not follow a set developmental or hierarchical sequence (Ukrainetz, 2015a).

### *Theoretical background*

The underlying theory is that practice of language skills stimulates cognitive processing and leads to enhanced overall functioning (Ukrainetz, 2015a).

## **Contextualized**

Features of these interventions include:

### *Naturalness*

Intervention activities are structured and directed by the clinician but occur in meaningful, natural interactions between the children and the clinician (Fey, 1986d). Intervention sessions are centered on a topic (e.g., in a storybook or a conversation) (Camarata & Nelson, 1992); with topic continuity across activities within a teaching session (Gillam et al., 2012).

### *Structure*

Intervention may not be structured according to a hierarchical sequence (i.e., top-down or inductive approach), as the focus is on maintaining a meaningful context (Helland et al., 2011; Paesani, 2005).

### *Theoretical background*

The underlying theory is that skills should be developed in naturalistic and meaningful contexts (Camarata & Nelson, 1992). Discrete skills may be targeted; however these skills remain embedded within a larger communicative purpose, such as telling a story (Ukrainetz, 2015a).

## **Activity Focused**

Features of these interventions include:

### *Naturalness*

Intervention occurs within the child's regular everyday activities or school curriculum, with adults responding to the child's communication by providing scaffolding and supports (Fey, 1986c; Ukrainetz, 2015a). Skills are taught directly within the daily-life activities in which they occur (Hyter, 2003), with focus on the activity being completed, rather than acquisition of discrete skills (Koole et al., 2015). Where skill acquisition occurs, this is directly related to performance on the specific activity being targeted.

### *Intervention Structure*

Intervention targets are selected based on functional need for performance in the activity being targeted, rather than developmental stages (Ukrainetz, 2015a).

### *Theoretical background*

Intervention is directly aimed at improving participation, functional performance or independence with regards to everyday activities (Koole et al., 2015; Westby, 2007).

## **Aspect Five (Teaching Techniques)**

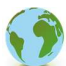

### **Background for Aspect Five**

Teaching techniques are the 'active ingredients' embedded within interventions (Turkstra et al., 2016; Warren et al., 2007). Other similar terms include procedures (McCauley et al., 2017), scaffolding or structural supports (Ukrainetz, 2006a, 2015a), "teaching episodes" or "dose" (Warren

et al., 2007). It is acknowledged that language interventions are often comprised of multiple active ingredients and that teaching episodes comprise of both what an SLP does (i.e., inputs) and the child's response to the techniques (i.e., output) (Baker, 2012). Depending on the goal or skills being targeted, the child's responses may be verbal or non-verbal (Kamhi, 2014). Successful use of teaching techniques evokes a response from the child (either immediate or over time) and leads to positive therapeutic change.

Intervention techniques may facilitate either explicit or implicit learning (Alt et al., 2012; Ebbels, 2014; Finestack & Fey, 2009; Paesani, 2005). In implicit intervention approaches the child is not made consciously aware of the target form being taught, with the interventions often occurring in naturally occurring games or book reading contexts with the focus on communicative meaning over linguistic form. In explicit intervention approaches, the child is made explicitly aware of the target being taught through specific rules or patterns in teaching tasks designed to engage meta-cognitive skills. These rules are specifically taught prior to the presentation of examples in which the rule is applied (i.e., linguistic form, rather than meaning, is presented first).

In this taxonomy, the descriptive categories described by Ukrainetz (2006b) have been used as a structure to describe techniques that have been identified from literature as those that may be used in language interventions (Beukelman & Mirenda, 2013a, 2013b; Ebbels, 2007; Eisenberg, 2014; Embry & Biglan, 2008; Gillam & Loeb, 2010; Hegde, 2006; Hyter, 2003; Kaderavek, 2015b; Kamhi, 2014; McClintock et al., 2014; Paul & Norbury, 2012c; Proctor-Williams, 2009; Proctor-Williams & Fey, 2007; Reichow & Volkmar, 2010; Rosenshine, 2012; Roth & Paul, 2014; Smith-Lock et al., 2013; Smith-Lock et al., 2015; Snell et al., 2006; Starling et al., 2012; Warren et al., 2007; White et al., 2007). The distinction between explicit and implicit teaching is identified through the types of techniques used in the intervention i.e., presence or absence of explicit instructions (Finestack & Fey, 2009; Smith-Lock et al., 2013).

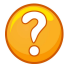

## **Definitions for Aspect Five**

**Prompting (or response) techniques:** Prompts or cues that are intended to elicit an immediate response from a child (Ukrainetz, 2006b). These occur before a "client act" (Baker, 2012; Warren et al., 2007). For example, an SLP may use closed and open-ended questions to elicit 50 productions of past tense verbs from a child in an intervention session. Prompts are repeated (to elicit a target multiple times); are selected depending on a child's current level of ability; and are reduced (faded) over time to lead to greater independence from the child. The child's response to prompts may be verbal or non-verbal, depending on the goal being targeted. Prompting techniques are:

- **Time delay (expectant waiting):** Waiting longer than is typical for a desired child response (with no other prompts provided while waiting).
- **Physical (tactile) prompts/cues:** Use of touch to prompt or cue a child to begin or continue a task.
- **Gestural prompts/cues:** Use of gesture or facial expression to elicit a target response.
- **Visual (pictures, symbols or written) prompts/cues:** Use of visual prompts or cues to elicit a target response.
- **Verbal (auditory) prompts/cues:** Use of a verbal prompt or cues to elicit a target response. This may include:
  - **Questions (open or closed):** Use of questions to elicit a targeted response. The format of questions varies depending on the desired response.
  - **Suggestions (direct or indirect):** May be a direct instruction regarding the expected response.
  - **Cloze completion:** Giving a word, sentence, or phrase for the child to complete.
  - **Phonemic prompt:**  
Use of an initial sound/syllable in a word to prompt production.
- **Model for Imitation:** Specific request/expectation for the child to produce (or imitate) a response (verbal, written, symbolic or gestural) that has been explicitly modeled.

**Linguistic techniques:** These techniques do not intend to elicit an immediate response from a child but are used repeatedly to highlight the communication skills or linguistic rules being targeted in order to facilitate development over time (Ukrainetz, 2006b). For example, an adult may provide 50 expansions of a child's utterance in an intervention session to demonstrate Subject-Verb-Object sentence structures. Linguistic techniques are:

- **Model for demonstration:** Deliberate presentation or model of an intervention target, without expectation of immediate response from the child. Demonstrations may be provided by:
  - **Adult modeling** (either in real-time or through videorecording)
  - **Peer modeling** (either in real-time or through videorecording)
  - Note: the presence of peers does not in itself constitute peer-modeling unless the peer has been deliberately primed or placed to provide modeling.
  - **Video modeling (or video feed-forward):** child's response is recorded and then edited and corrected before playback to child.
- **Think alouds:** Verbalization of the problem-solving processes or strategies involved in completing a task, such as making predictions, decoding texts, summarizing information, editing writing.
- **Focused contrast:** Deliberate comparing of incorrect response with a correct response.

- **Inflectional model (for demonstration):** Demonstrational models in which deliberate stress is given to a target.
- **Recasts/expansions:** Immediate repetition of the child's utterance with correction or modification of a target whilst maintaining the word order and core meaning of the utterance.
- **Extensions:** Immediate response to child's utterance by the adding one or more linguistic forms to expand the complexity or meaning of the utterance.

**Regulatory techniques:** These techniques have functions of facilitating the child's understanding of the goal or skill being targeted; assisting with maintaining focus to learning tasks; or assisting the child to self-monitor (Ukrainetz, 2006b). Regulatory techniques do not intend to elicit an immediate response from a child or demonstrate a specific communication skill or linguistic rule. They may not be directly counted in "dose," however may be considered important techniques for achieving intervention outcome. Regulatory techniques are:

- **Explicit instructions:** Explicit instructions regarding the use of target forms, such as linguistic rules or social expectations are provided. Instructions may be provided as:
  - **Verbal (explicit) instructions:** Verbal information is provided to make the child explicitly aware of the linguistic rules or features being taught.
  - **Visual (explicit) instructions:** Visual materials are used to explicitly explain the linguistic rules or features being taught.
- **Relating new content to past knowledge:** Commenting on links or similarities between tasks or skills.
- **Explanation of goals or expectations:** Learning intentions, goals or task expectations are described in an age-appropriate manner. Note: this is different to the technique "explicit instructions" (described above), because the explanations are about intervention goals or expectations rather than the communication rules/features being targeted. Goals or expectations may be provided as:
  - **Verbal explanation:** Verbal information is provided to explain goals or expectations.
  - **Visual explanation:** Visual information is provided to explain goals or expectations.
- **Feedback:** The purpose of feedback is to provide the child with specific information on their performance (strengths and weaknesses) in relation to the intervention target. Feedback is intentional, specific to the goal being targeted and provided immediately (or as soon as practicable) after the child's performance. Feedback may be provided as:
  - **Verbal feedback:** Child gets verbal information regarding their response or performance.
  - **Visual feedback:** Child gets visual information regarding their response or performance.
  - **Repetition as feedback:** Child's own response is repeated as a means of encouraging the child to correct their response. Repetition may be provided by an adult or may be a recording of the child's response played back.
  - **Natural consequence:** Feedback received through natural consequence in an interaction.
- **Rewards:** Rewards (positive reinforcement) provided for the purpose of keeping the child motivated or interested. Rewards include in-tangible reinforcement or tangible reinforcement. Natural consequences are not identified twice as also being rewards (e.g., receiving a desired item that was successfully requested is identified as a natural consequence rather than a reward); however, rewards may be provided in addition to a natural consequence (e.g., receiving a desired item and also getting a sticker to place on a chart).

Note: Although verbal praise, encouragements, and positive affirmations are also rewarding; they are not included here. This is because these positive interactions are considered to have a place in all interventions (either with or without other rewards or feedback) and are thus not a feature that distinguishes some interventions from others.

## References

- Alt, M., Meyers, C., & Ancharski, A. (2012). Using principles of learning to inform language therapy design for children with specific language impairment. *International Journal of Language & Communication Disorders*, 47(5), 487–498. <https://doi.org/10.1111/j.1460-6984.2012.00169.x>
- American Speech-Language-Hearing Association. (2010). *Roles and responsibilities of speech-language pathologists in schools [Professional Issues Statement]*. <http://www.asha.org/policy/PI2010-00317/>
- American Speech-Language-Hearing Association. (n.d.). *Language in Brief*. <http://www.asha.org/Practice-Portal/Clinical-Topics/Spoken-Language-Disorders/Language-In--Brief/>
- Apel, K. (2014). Clinical scientists improving clinical practices: In thoughts and actions. *Language, Speech, and Hearing Services in Schools*, 45, 104–109. [https://doi.org/10.1044/2014\\_LSHSS-14-0003](https://doi.org/10.1044/2014_LSHSS-14-0003)
- Archibald, L. (2017). SLP-educator classroom collaboration: A review to inform reason-based practice. *Autism & Developmental Language Impairments*, 2, 1–17. <https://doi.org/10.1177/2396941516680369>
- Baker, E. (2012). Optimal intervention intensity. *International Journal of Speech-Language Pathology*, 14(5), 401–409. <https://doi.org/10.3109/17549507.2012.700323>
- Beukelman, D. R., & Mirenda, P. (2013a). Instruction to Support Linguistic and Social Competence. In *Augmentative and Alternative Communication: Supporting Children and Adults with Complex Communication Needs* (pp. 279–308). Paul H. Brookes Publishing.
- Beukelman, D. R., & Mirenda, P. (2013b). Language Development and Intervention: Challenges, Supports and Instructional Approaches. In *Augmentative and Alternative Communication: Supporting Children and Adults with Complex Communication Needs* (pp. 255–278). Paul H. Brookes Publishing.
- Boulineau, T., Fore, C., Hagan-Burke, S., & Burke, M. D. (2004). Use of story-mapping to increase the story-grammar text comprehension of elementary students with learning disabilities. *Learning Disability Quarterly*, 27(2), 105–121. <https://doi.org/10.2307/1593645>
- Boyle, J., McCartney, E., Forbes, J., & O'Hare, A. (2007). A randomised controlled trial and economic evaluation of direct versus indirect and individual versus group modes of speech and language therapy for children with primary language impairment. *Health Technology Assessment*, 11(25), iii–iv, xi.
- Boyle, J., McCartney, E., O'Hare, A., & Law, J. (2010). Intervention for mixed receptive–expressive language impairment: a review. *Developmental Medicine and Child Neurology*, 52(11), 994–999. <https://doi.org/10.1111/j.1469-8749.2010.03750.x>
- Camarata, S. M., & Nelson, K. E. (1992). Treatment efficiency as a function of target selection in the remediation of child language disorders. *Clinical Linguistics & Phonetics*, 2(167–178). <https://doi.org/10.3109/02699209208985528>
- Cirrin, C. M., & Gillam, R. B. (2008). Language intervention practises for school-age children with spoken language disorders: A systematic review. *Language, Speech, and Hearing Services in Schools*, 39(1), 110–137. [https://doi.org/10.1044/0161-1461\(2008/012\)](https://doi.org/10.1044/0161-1461(2008/012))
- Cirrin, C. M., Schooling, T. L., Nelson, N. W., Deihl, S. F., Flynn, P. F., Staskowski, M., & Adamczyk, D. F. (2010). Evidence-Based systematic review: Effects of different service delivery models on communication outcomes for elementary school-aged children. *Language, Speech, and Hearing Services in Schools*, 41, 233–264. [https://doi.org/10.1044/0161-1461\(2009/08-0128\)](https://doi.org/10.1044/0161-1461(2009/08-0128))
- Damico, J. S., & Damico, S. K. (1997). The establishment of a dominant interpretive framework in language intervention. *Language, Speech & Hearing Services in Schools*, 28(3), 288–296. <https://doi.org/10.1044/0161-1461.2803.288>
- Dawson, P., & Guare, R. (2015). Overview of Executive Skills. In *Executive Skills in Children and Adolescents* (2nd ed.). Guilford Publications.
- Dickson, K., Marshall, M., Boyle, J., McCartney, E., O'Hare, A., & Forbes, J. (2009). Cost analysis of direct versus indirect and individual versus group modes of manual-based speech-and-language therapy for primary school-age children with primary language impairment. *International Journal of Language & Communication Disorders*, 44(3), 369–381.
- Ebbels, S. (2007). Teaching grammar to school-aged children with specific language impairment using Shape Coding. *Child Language Teaching and Therapy*, 23(1), 67–93.
- Ebbels, S. (2014). Effectiveness of intervention for grammar in school-aged children with primary language impairments: A review of the evidence. *Child Language Teaching and Therapy*, 30(1), 7–40. <https://doi.org/10.1177/0265659013512321>
- Edwards, M., Stredler-Brown, A., & Houston, K. T. (2012). Expanding use of telepractice in speech-language pathology and audiology. *Volta Review*, 112(3), 227–242.
- Eisenberg, S. (2014). What works in therapy: Further thoughts on improving clinical practice for children with language disorders. *Language, Speech, and Hearing Services in Schools*, 45(2), 117–126. [https://doi.org/10.1044/2014\\_LSHSS-14-0021](https://doi.org/10.1044/2014_LSHSS-14-0021)
- Embry, D. D., & Biglan, A. (2008). Evidence-based kernels: Fundamental units of behavioral influence. *Clinical Child and Family Psychology Review*, 11, 75–113. <https://doi.org/10.1007/s10567-008-0036-x>
- Fairweather, G. C., Lincoln, M. A., & Ramsden, R. (2016). Speech-language pathology teletherapy in rural and remote educational settings: Decreasing service inequities. *International Journal of Speech Language Pathology* 18(6), 592–602. <https://doi.org/10.3109/17549507.2016.1143973>
- Fey, M. E. (1986a). Developing Intervention Plans. In *Language Intervention with Young Children*. College-Hill Press.
- Fey, M. E. (1986b). *Language Intervention with Young Children*. College-Hill Press.
- Fey, M. E. (1986c). Training Content-Form Interactions: Child-Oriented Approaches. In *Language Intervention with Young Children* (pp. 191–204). College-Hill Press.

- Fey, M. E. (1986d). Training Content-Form Interactions: Hybrid Intervention Approaches. In *Language Interventions with Young Children* (pp. 205-234). College-Hill Press.
- Fey, M. E. (1986e). Training Content-Form Interactions: Trainer-Oriented Approaches. In *Language Intervention with Young Children* (pp. 121-190). College-Press.
- Finestack, L. H., & Fey, M. E. (2009). Evaluation of a deductive procedure to teach grammatical inflections to children with language impairment. *American Journal of Speech-Language Pathology*, 18(3), 289-303. [https://doi.org/10.1044/1058-0360\(2009/08-0041\)](https://doi.org/10.1044/1058-0360(2009/08-0041))
- Gill, C. B., Klecan-Aker, J., Roberts, T., & Fredenburg, K. A. (2003). Following directions: Rehearsal and visualization strategies for children with specific language impairment. *Child Language Teaching and Therapy*, 19(1), 85-103. <https://doi.org/10.1191=0265659003ct245oa>
- Gillam, R. B., Crofford, J. A., Gale, M. A., & Hoffman, L. M. (2001). Language change following computer-assisted language instruction with Fast ForWord or Laureate Learning Systems Software. *American Journal of Speech-Language Pathology* 10, 231-247. [https://doi.org/10.1044/1058-0360\(2001/021\)](https://doi.org/10.1044/1058-0360(2001/021))
- Gillam, R. B., & Loeb, D. (2010). Principles for school-age language intervention: Insights from a randomized controlled trial. *ASHA Leader*, 15(1), 10-13.
- Gillam, S. L., Gillam, R. B., & Reece, K. (2012). Language outcomes of contextualized and decontextualized language intervention: Results of an early efficacy study. *Language, Speech, and Hearing Services in Schools*, 43(3), 276-291. [https://doi.org/10.1044/0161-1461\(2011/11-0022](https://doi.org/10.1044/0161-1461(2011/11-0022)
- Hall-Mills, S. S. (2010). *Linguistic Feature Development in Elementary Writing: Analysis of Microstructure and Macrostructure Features in a Narrative and an Expository Genre* Florida State University]. U.S. <http://diginole.lib.fsu.edu/islandora/object/fsu:182464/datastream/PDF/view>
- Haynes, W. O., & Pindzola, R. H. (2012). Introduction to Diagnosis and Evaluation: Philosophical Issues and General Guidelines. In *Diagnosis and Evaluation in Speech Pathology* (pp. 2-32). Pearson.
- Hayward, D., & Schneider, P. (2000). Effectiveness of teaching story grammar knowledge to pre-school children with language impairment. An exploratory study. *Child Language Teaching and Therapy*, 16(3), 255-284. <https://doi.org/10.1177/026565900001600303>
- Hegde, M. N. M., C. A. (2006). Evidence-Based Treatment Techniques. In *Language Disorders in Children* (pp. 173-208). Pearson
- Helland, T., Tomas, T., Hovden, M., Ofte, S., & Heimann, M. (2011). Effects of bottom-up and top-down intervention principles in emergent literacy in children at risk of developmental dyslexia: A longitudinal study. *Journal of Learning Disabilities*, 44(2), 105-122. <https://doi.org/10.1177/0022219410391188>
- Hemmeter, M. L. (2000). Classroom-based interventions. *Topics in Early Childhood Special Education*, 20(1), 56-61. <https://doi.org/10.1177/027112140002000110>
- Henry, L. A., Messer, D. J., & Nash, G. (2012). Executive functioning in children with specific language impairment. *Journal of Child Psychology and Psychiatry*, 53(1), 37-45. <https://doi.org/10.1111/j.1469-7610.2011.02430.x>
- Hepting, N. H., & Goldstein, H. (1996). What's natural about naturalistic language intervention? *Journal of Early Intervention*, 20(3), 249-264. <https://doi.org/10.1177/105381519602000308>
- Hyter, Y. D. (2003). Language intervention for children with emotional or behavioral disorders. *Journal of the Council for Children with Behavioral Disorders*, 29(1), 65-76. <https://doi.org/10.1177/019874290302900104>
- Justice, L. M., & Redle, E. R. (2014). Communication Sciences and Disorders: A Clinical Evidence-Based Approach In L. M. Justice & E. R. Redle (Eds.), *Communication Assessment and Intervention: Evidence-Based Practice* (3 ed., pp. 187-189). Pearson.
- Kaderavek, J. N. (2015a). Assessment of Language Disorders. In *Language disorders in children: Fundamental concepts of assessment and intervention* (pp. 45-95). Pearson.
- Kaderavek, J. N. (2015b). Principles of Intervention. In *Language Disorders in Children* (pp. 135-170). Pearson.
- Kamhi, A. G. (2014). Improving clinical practices for children with language and learning disorders. *Language, Speech, and Hearing Services in Schools*, 45(92-103). [https://doi.org/10.1044/2014\\_LSHSS-13-0063](https://doi.org/10.1044/2014_LSHSS-13-0063)
- Knight, V., McKissick, B. R., & Saunders, A. (2013). A review of technology-based interventions to teach academic skills to students with autism spectrum disorder. *Journal of Autism and Developmental Disorders*, 43(11), 2628-2648. <https://doi.org/10.1007/s10803-013-1814-y>
- Koole, H., Nelson, N. W., & Curtis, A. B. (2015). Factors influencing choices of contextualized versus traditional practices with children and adolescents who have traumatic brain injury. *Language, Speech, and Hearing Services in Schools*, 46, 352-361. [https://doi.org/10.1044/2015\\_LSHSS-14-0109](https://doi.org/10.1044/2015_LSHSS-14-0109)
- Larson, V. L., & McKinley, N. L. (2003a). Overview of Intervention for Older Students. In *Communication Solutions for Older Students*. Thinking Publications.
- Larson, V. L., & McKinley, N. L. (2003b). Procedures for Direct Assessment. In *Communication solutions for older students* (pp. 209-268). Thinking Publications.
- Larson, V. L., & McKinley, N. L. (2003c). Service delivery options for secondary students with language isorders *Seminars in Speech and Language* 24(3), 181-198 <https://doi.org/10.1055/s-2003-42824>
- Law, J., Campbell, C., Roulstone, S., Adams, C., & Boyle, J. (2008). Mapping practice onto theory: The speech and language practitioner's construction of receptive language impairment. *International Journal of Language and Communication Disorders*, 43, 245-263. <https://doi.org/10.1080/13682820701489717>
- Law, J., Garrett, Z., & Nye, C. (2003). Speech and language therapy interventions for children with primary speech and language delay or disorder. *Cochrane Database of Systematic Reviews*(3). <https://doi.org/10.1002/14651858.CD004110>



- Law, J., Lee, W., Roulstone, S., Wren, Y., Zeng, B., & Lindsay, G. (2012). *"What works": Interventions for children and young people with speech, language and communication needs*. Research Report DFE-RR274-BCRP10.
- Lopata, C., Thomeer, M. L., Volker, M. A., Nida, R. E., & Lee, G. K. (2008). Effectiveness of a manualized summer social treatment program for high-functioning children with Autism Spectrum Disorders. *Journal of Autism and Developmental Disorders*, 38, 890–904. <https://doi.org/10.1007/s10803-007-0460-7>
- Loukusa, S., & Moilanen, I. (2009). Pragmatic inference abilities in individuals with Asperger syndrome or high-functioning autism. A Review. *Research in autism spectrum disorders*, 3, 890-904. <https://doi.org/10.1016/j.rasd.2009.05.002>
- Marton, K., Abramoff, B., & Rosenzweig, S. (2005). Social cognition and language in children with specific language impairment (SLI). *Journal of Communication Disorders*, 38(2), 143-162. <https://doi.org/10.1016/j.jcomdis.2004.06.003>
- Mashima, P. A., & Doarn, C. R. (2009). Overview of telehealth activities in speech-language pathology. *Telemedicine and e-Health*, 14(10), 1101-1117. <https://doi.org/10.1089/tmj.2008.0080>
- McCauley, R. J., Fey, M. E., & Gillam, R. B. (2017). Introduction to Treatment of Language Disorders in children. In *Treatment of Language Disorders in Children* (2 ed., pp. 1-21). Paul H. Brookes Publishing Co.
- McClintock, B., Pesco, D., & Martin-Chang, S. (2014). Thinking aloud: Effects on text comprehension by children with specific language impairment and their peers. *International Journal of Language & Communication Disorders*, 49(6), 637-648. <https://doi.org/10.1111/1460-6984.12081>
- Molini-Avejonas, D. R., Rondon-Melo, S., de La Higuera Amato, C. A., & Samelli, A. G. (2015). A systematic review of the use of telehealth in speech, language and hearing sciences. *Journal of telemedicine and telecare*, 21(7), 367-376. <https://doi.org/10.1177/1357633X15583215>
- Montgomery, J. W., Magimairaj, B. M., & Finney, M. C. (2010). Working memory and Specific Language Impairment: An update on the relation and perspectives on assessment and treatment. *American Journal of Speech-Language Pathology*, 19, 78-94. [https://doi.org/10.1044/1058-0360\(2009/09-0028\)](https://doi.org/10.1044/1058-0360(2009/09-0028))
- Nippold, M. A. (2010). Language Sampling Tasks. In *Language Sampling with Adolescents* (pp. 35-54). Plural Publishing.
- Norris, J. A., & Hoffman, P. R. (1990). Language intervention within naturalistic environments. *Language, Speech, and Hearing Services in Schools*, 21(2), 72-84. <https://doi.org/10.1044/0161-1461.2102.72>
- Owens Jr, R. E. (2013). A functional language approach. In *Language disorders: A functional approach to assessment and intervention*. Pearson Higher Ed.
- Paesani, K. (2005). Literary texts and grammar instruction: Revisiting the inductive presentation. *Foreign language annals*, 38(1), 15-23. <https://doi.org/10.1111/j.1944-9720.2005.tb02449.x>
- Paul, D., & Roth, F. P. (2011). Guiding principles and clinical applications for speech-language pathology practice in early intervention. *Language, Speech, and Hearing Services in Schools*, 42, 320–330. [https://doi.org/10.1044/0161-1461\(2010/09-0079](https://doi.org/10.1044/0161-1461(2010/09-0079)
- Paul, R., & Norbury, C. F. (2012a). Assessment. In R. Paul & C. F. Norbury (Eds.), *Language disorders from infancy through adolescence: Listening, speaking, reading, writing and communicating* (4th ed., pp. 22-60). Mosby Elsevier.
- Paul, R., & Norbury, C. F. (2012b). Assessment and intervention in the prelinguistic period. In R. Paul & C. F. Norbury (Eds.), *Language Disorders from Infancy through Adolescence: Listening, Speaking, Reading, Writing and Communicating* (4 ed., pp. 183-233). Mosby Elsevier.
- Paul, R., & Norbury, C. F. (2012c). Principles of Intervention. In R. Paul & C. F. Norbury (Eds.), *Language Disorders from Infancy through Adolescence: Listening, Speaking, Reading, Writing and Communicating* (4 ed., pp. 61-99). Mosby Elsevier.
- Pearce, W. M., James, D. G., & McCormack, P. F. (2010). A comparison of oral narratives in children with specific language and non-specific language impairment. *Clinical Linguistics & Phonetics*, 24(8), 622-645. <https://doi.org/10.3109/02699201003736403>
- Pokorni, J. L., Worthington, C. K., & Jamison, P. L. (2004). Phonological awareness intervention: Comparison of Fast ForWord, Earobics, and LiPS. *The Journal of Educational Research*, 97(3), 147-157. <https://doi.org/10.3200/JOER.97.3.147-158>
- Proctor-Williams, K. (2009). Dosage and distribution in morphosyntax intervention: Current evidence and future needs. *Topics in Language Disorders*, 29(4), 294-311. <https://doi.org/10.1097/TLD.0b013e3181c29dc0>
- Proctor-Williams, K., & Fey, M. E. (2007). Recast density and acquisition of novel irregular past tense verbs. *Journal of Speech, Language, and Hearing Research*, 50, 1029-1047. [https://doi.org/10.1044/1092-4388\(2007/072](https://doi.org/10.1044/1092-4388(2007/072)
- Pullen, P. C., Tuckwiller, E. D., Konold, T. R., Maynard, K. L., & Coyne, M. D. (2010). A tiered intervention model for early vocabulary instruction: The effects of tiered instruction for young students at risk for reading disability. *Learning Disabilities Research & Practice*, 25(3), 110-123.
- Ramdoss, S., Lang, R., Mulloy, A., Franco, J., O'Reilly, M., Didden, R., & Lancioni, G. (2011). Use of computer-based interventions to teach communication skills to children with Autism Spectrum Disorders: A systematic review. *Journal of Behavioral Education*, 20(1), 55-76. <https://doi.org/10.1007/s10864-010-9112-7>
- Reichow, B., & Volkmar, F. R. (2010). Social skills interventions for individuals with autism: Evaluation for evidence-based practices within a best evidence synthesis framework. *Journal of Autism and Developmental Disorders*, 40(2), 149-166. <https://doi.org/10.1007/s10803-009-0842-0>
- Roberts, M. Y., & Kaiser, A. P. (2011). The effectiveness of parent-implemented language interventions: A meta-analysis. *American Journal of Speech-Language Pathology*, 20, 180-199. [https://doi.org/10.1044/1058-0360\(2011/10-0055](https://doi.org/10.1044/1058-0360(2011/10-0055)



- Robertson, S. A. (2007). Assessment of preschool and early school-age children with Developmental Language Disorders. In A. G. Kamhi, J. J. Masterson, & K. Apel (Eds.), *Clinical decision-making in Developmental Language Disorders*. Paul. H. Brooks Publishing Co.
- Rosenshine, B. (2012). Principles of instruction: Research-based strategies that all teachers should know. *American Educator*, 36(1), 12.
- Roth, F. P., & Paul, R. (2014). Communication Intervention: Principals and Procedures. In R. Paul (Ed.), *Introduction to Clinical Methods in Communication Disorders* (pp. 175-202). Paul H. Brooks Publishing Co.
- Sanger, D., Snow, P. C., Colburn, C., Gergen, M., & Ruf, M. (2012). Speech-language pathologists' reactions to response to intervention: A qualitative study. *International Journal of Speech-Language Pathology*, 14(1), 1-10. <https://doi.org/10.3109/17549507.2011.604793>
- Schraeder, T. (2008). Speech-Language Service Delivery Formats used in Public Schools: Intervention Approaches. In *A Guide to School Services in Speech-Language Pathology*. Plural.
- Serry, T., Rose, M., & Liampittong, P. (2008). Oral language predictors for the at-risk reader: A review. *International Journal of Speech-Language Pathology*, 10(6), 392-403. <https://doi.org/10.1080/17549500802056128>
- Shadiev, R., Hwang, W. Y., Chen, N. S., & Huang, Y. M. (2014). Review of speech-to-text recognition technology for enhancing learning. *Educational Technology & Society*, 17(4), 65-84.
- Singer, B. D., & Bashir, A. S. (1999). What are executive functions and self-regulation and what do they have to do with language-learning disorders? *Language, Speech, and Hearing Services in Schools*, 30(3), 265-273. <https://doi.org/10.1044/0161-1461.3003.265>
- Smith-Lock, K. M., Leitaio, S., Lambert, L., & Nickels, L. (2013). Effective intervention for expressive grammar in children with specific language impairment. *International Journal of Language & Communication Disorders*, 48(3), 265-282. <https://doi.org/10.1111/1460-6984.12003>
- Smith-Lock, K. M., Leitaio, S., Prior, P., & Nickels, L. (2015). The effectiveness of two grammar treatment procedures for children with SLI: A randomized clinical trial. *Language, Speech, and Hearing Services in Schools*, 46, 312-324. [https://doi.org/10.1044/2015\\_LSHSS-14-0041](https://doi.org/10.1044/2015_LSHSS-14-0041)
- Snell, M. E., Chen, L. Y., & Hoover, K. (2006). Teaching augmentative and alternative communication to students with severe disabilities: A review of intervention research 1997-2003. *Research and Practice for Persons with Severe Disabilities*, 31(3), 203-214.
- Speech Pathology Australia. (2014). *Submission to the inquiry into the prevalence of different types of speech, language and communication disorders and speech pathology services in Australia*. [https://www.aph.gov.au/Parliamentary\\_Business/Committees/Senate/Community\\_Affairs/Speech\\_Pathology](https://www.aph.gov.au/Parliamentary_Business/Committees/Senate/Community_Affairs/Speech_Pathology)
- Starling, J., Munro, N., Togher, L., & Arciuli, J. (2012). Training secondary school teachers in instructional language modification techniques to support adolescents with language impairment: A randomized controlled trial. *Language, Speech and Hearing Services in Schools*, 43(4), 475-495. [https://doi.org/10.1044/0161-1461\(2012/11-0066\)](https://doi.org/10.1044/0161-1461(2012/11-0066))
- Throneburg, R. N., Calvert, L. K., Sturm, J. J., Paramboulas, A. A., & Paul, P. J. (2000). A comparison of service delivery models: Effects on curricular vocabulary skills in the school setting. *American Journal of Speech Language Pathology*, 9(1), 10-20. <https://doi.org/10.1044/1058-0360.0901.10>
- Turkstra, L. S., Norman, R., Whyte, J., Dijkers, M. P., & Hart, T. (2016). Knowing what we're doing: Why specification of treatment methods is critical for evidence-based practice in speech-language pathology. *American Journal of Speech-Language Pathology*, 25(2), 164-172. [https://doi.org/10.1044/2015\\_AJSLP-15-0060](https://doi.org/10.1044/2015_AJSLP-15-0060)
- Ukrainetz, T. A. (2006a). Assessment and Intervention within a Contextualized Skill Framework. In *Contextualized Language Intervention: Scaffolding Pre-K-12 Literacy Achievement*. Thinking Publications.
- Ukrainetz, T. A. (2006b). Assisting student's in beoming self-regulated writers. In T. A. Ukrainetz (Ed.), *Contextualized Language Intervention: Scaffolding Pre-K-12 Literacy Achievement* (pp. 570-572). Thinking Publications.
- Ukrainetz, T. A. (2015a). The Foundations of Language Intervention: Theory and Research. In T. A. Ukainetz (Ed.), *School-Age Language Intervention: Evidence-Based Practices*. PRO-ED.
- Ukrainetz, T. A. (2015b). Speech-Language Pathology in the Schools. In *School-Age Language Intervention: Evidence-Based Practices*. Pro-Ed.
- Vogindroukas, I., & Zikopoulou, O. (2011). Idiom understanding in people with Asperger syndrome/high functioning autism. *Revista da Sociedade Brasileira de Fonoaudiologia*, 16(4), 390-395. <https://doi.org/10.1590/S1516-80342011000400005>
- Warren, S. F., Fey, M. E., & Yoder, P. J. (2007). Differential treatment intensity research: A missing link to creating optimally effective communication interventions. *Mental Retardation and Developmental Disabilities Research Reviews*, 13, 70-77. <https://doi.org/10.1002/mrdd.20139>
- Westby, C. (2007). Application of the ICF in children with language impairments. *Seminars in Speech and Language*, 28(4), 265-272. <https://doi.org/10.1055/s-2007-986523>
- Westerveld, M. F., & Claessen, M. (2014). Clinician survey of language sampling practices in Australia. *International Journal of Speech-Language Pathology*, 16(3), 242-249. <https://doi.org/10.3109/17549507.2013.871336>
- White, S. W., Keonig, K., & Scahill, L. (2007). Social skills development in children with autism spectrum disorders: A review of the intervention research. *Journal of Autism and Developmental Disorders*, 37(10), 1858-1868. <https://doi.org/10.1007/s10803-006-0320-x>
- Wolf Nelson, N., & Van Meter, A. M. (2007). Measuring written language ability in narrative samples. *Reading & Writing Quarterly*, 23(3), 287-309. <https://doi.org/10.1080/10573560701277807>

Supplemental material, Denman et al., "Consensus on Terminology for Describing Child Language Interventions: A Delphi Study," *JSLHR*, [https://doi.org/10.1044/2021\\_JSLHR-20-00656](https://doi.org/10.1044/2021_JSLHR-20-00656)

- Wolter, J. (2007). Assessment and Diagnosis of Adolescents and Young Adults: Spoken Language Disorders. In A. G. Kamhi, J. J. Masterson, & K. Apel (Eds.), *Clinical Decision-Making in Developmental Language Disorders* (pp. 55-76). Paul. H. Brooks Publishing Co.
- World Health Organization. (2015). *International Statistical Classification of Diseases and Related Health Problems, Tenth Revision* (Vol. 10). World Health Organization. <http://apps.who.int/classifications/icd10/browse/2015/en#/F80-F89>
- Wright, B., Clarke, N., Jordan, J. O., Young, A. W., Clarke, P., Miles, J., Nation, K., Clarke, L., & Williams, C. (2008). Emotion recognition in faces and the use of visual context in young people with high-functioning autism spectrum disorders. *Autism & Developmental Language Impairments*, 12(6), 607-662. <https://doi.org/10.1177/1362361308097118>
- Zabiela, C., Williams, C., & Leitaio, S. (2007). Service delivery in rural, remote and regional speech pathology. Part 1: Current approaches. *ACQuiring Knowledge in Speech, Language and Hearing*, 9(2), 39-34. <https://espace.curtin.edu.au/handle/20.500.11937/25681>
